# Supplementary material for: Developmental Signatures of Microbiota-Derived Metabolites in the Mouse Brain
Source: PubMed Central journal article supplement (PMC7281085; doi:10.3390/metabo10050172), 2020-04-25
Supplement: metabolites-10-00172-s001.pdf [file metabolites-10-00172-s001.pdf]

# Developmental signatures of microbiota-derived metabolites in the mouse brain

Jonathan Swann <sup>1,2,3\*</sup>, Sonia Spitzer <sup>4</sup> and Rochellys Diaz-Heijtz <sup>3,\*</sup>

## Supplementary Information

**Supplementary Figure 1:** Principal components analysis (PCA) model constructed on the forebrain metabolic profiles of all study animals. A) Scores plot (PC1 v PC2) and B) loadings plot from the PCA model ( $R^2 = 95\%$ ) using mean centered and pareto scaled data. AMP, adenosine monophosphate; GABA,  $\gamma$ -aminobutyric acid; GPC, glycerophosphocholine.

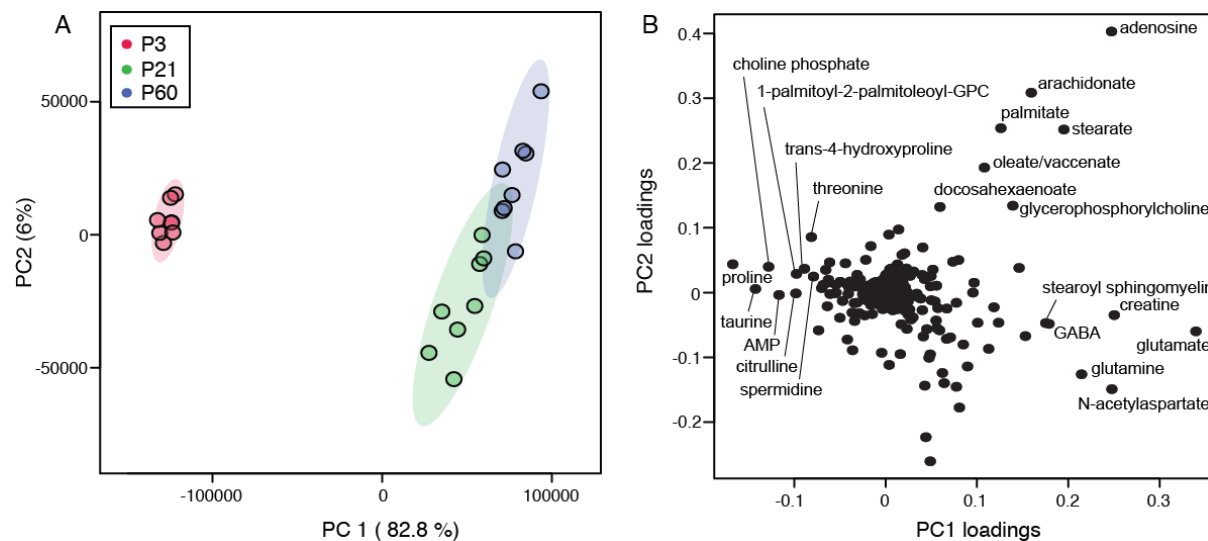

**Supplementary Table S1:** Forebrain metabolites significantly different between prepubertal (P21) and postnatal (P3). 121 metabolites were significantly higher in the forebrain of P21 mice compared to P3 mice and 78 metabolites significantly lower. Criteria for significance was greater than two fold-change (P21 relative to P3) and FDR-adjusted  $P < 0.05$ .

| Metabolite                                      | Fold change<br>(P21 vs. P3) | log2(FC) | p.adj    | -Log10(p) |
|-------------------------------------------------|-----------------------------|----------|----------|-----------|
| N-acetylaspartate                               | 4.6362                      | 2.2129   | 1.51E-16 | 15.822    |
| pyroglutamine                                   | 17.699                      | 4.1456   | 2.22E-16 | 15.653    |
| 1,2-dioleoyl-GPC 181/181                        | 5.3136                      | 2.4097   | 3.02E-16 | 15.52     |
| sphingomyelin d181/181, d182/180                | 6.9231                      | 2.7914   | 4.50E-16 | 15.347    |
| 1-stearoyl-2-arachidonoyl-GPC 180/204           | 3.6097                      | 1.8519   | 6.67E-16 | 15.176    |
| cystathionine                                   | 0.24157                     | -2.0495  | 1.57E-15 | 14.803    |
| 1-1-enyl-stearoyl-2-arachidonoyl-GPE P-180/204  | 4.0986                      | 2.0351   | 1.57E-15 | 14.803    |
| xanthine                                        | 4.956                       | 2.3092   | 1.89E-15 | 14.724    |
| putrescine                                      | 0.048905                    | -4.3539  | 2.41E-15 | 14.618    |
| pro-hydroxy-pro                                 | 0.028596                    | -5.1281  | 3.10E-15 | 14.508    |
| carnosine                                       | 7.4746                      | 2.902    | 3.10E-15 | 14.508    |
| sphingosine                                     | 4.2331                      | 2.0817   | 5.05E-15 | 14.297    |
| 1-1-enyl-palmitoyl-2-palmitoyl-GPC P-160/160    | 9.6679                      | 3.2732   | 6.53E-15 | 14.185    |
| N-acetyltaurine                                 | 0.10845                     | -3.205   | 9.82E-15 | 14.008    |
| adenine                                         | 4.2115                      | 2.0743   | 9.82E-15 | 14.008    |
| stearoyl sphingomyelin d181/180                 | 8.3916                      | 3.0689   | 1.17E-14 | 13.932    |
| trans-4-hydroxyproline                          | 0.19385                     | -2.367   | 2.17E-14 | 13.665    |
| orotidine                                       | 0.24803                     | -2.0114  | 2.69E-14 | 13.571    |
| homocarnosine                                   | 47585000                    | 25.504   | 2.94E-14 | 13.532    |
| 1,2-dioleoyl-GPE 181/181                        | 3.794                       | 1.9237   | 3.36E-14 | 13.473    |
| 1-1-enyl-palmitoyl-2-oleoyl-GPC P-160/181       | 43.796                      | 5.4527   | 3.80E-14 | 13.42     |
| phosphoethanolamine                             | 0.47563                     | -1.0721  | 6.13E-14 | 13.213    |
| desmosterol                                     | 0.13929                     | -2.8438  | 6.75E-14 | 13.17     |
| N-acetylglutamate                               | 5.345                       | 2.4182   | 6.75E-14 | 13.17     |
| 1-1-enyl-palmitoyl-2-arachidonoyl-GPE P-160/204 | 2.5172                      | 1.3318   | 7.36E-14 | 13.133    |
| 7-methylguanine                                 | 0.06562                     | -3.9297  | 1.10E-13 | 12.96     |
| 3-hydroxy-3-methylglutarate                     | 0.32287                     | -1.631   | 1.55E-13 | 12.811    |
| 2'-deoxycytidine                                | 0.24939                     | -2.0035  | 2.11E-13 | 12.677    |
| N6-carbamoylthreonyladenosine                   | 0.26899                     | -1.8944  | 3.99E-13 | 12.399    |
| 1-1-enyl-stearoyl-2-oleoyl-GPE P-180/181        | 14.717                      | 3.8794   | 4.07E-13 | 12.391    |
| 1-1-enyl-palmitoyl-2-linoleoyl-GPE P-160/182    | 3.0504                      | 1.609    | 4.07E-13 | 12.391    |
| 1,2-dioleoyl-GPC 181/181                        | 2.0284                      | 1.0203   | 4.65E-13 | 12.333    |
| sphingomyelin d181/200, d161/220                | 8.949                       | 3.1617   | 5.12E-13 | 12.291    |
| N-acetylarginine                                | 3.9532                      | 1.983    | 5.12E-13 | 12.291    |
| citrate                                         | 3.9204                      | 1.971    | 5.20E-13 | 12.284    |
| maltotriose                                     | 0.12626                     | -2.9856  | 6.27E-13 | 12.202    |
| N-acetylglutamine                               | 2.5691                      | 1.3612   | 6.65E-13 | 12.177    |
| homoarginine                                    | 0.23484                     | -2.0902  | 8.69E-13 | 12.061    |
| glycosyl-N-stearoyl-sphingosine                 | 6.7299                      | 2.7506   | 8.94E-13 | 12.049    |
| dimethylarginine SDMA ADMA                      | 0.38178                     | -1.3892  | 1.01E-12 | 11.997    |
| sphingomyelin d181/221, d182/220, d161/241      | 4.3887                      | 2.1338   | 1.51E-12 | 11.822    |
| trigonelline                                    | 9.8812                      | 3.3047   | 1.53E-12 | 11.816    |
| 4-imidazoleacetate                              | 0.03481                     | -4.8443  | 1.76E-12 | 11.756    |
| sphingomyelin d181/241, d182/240                | 3.4102                      | 1.7699   | 1.76E-12 | 11.756    |
| maltotetraose                                   | 0.10261                     | -3.2848  | 1.77E-12 | 11.752    |

|                                                 |          |         |          |        |
|-------------------------------------------------|----------|---------|----------|--------|
| N-acetylmethionine                              | 4.3848   | 2.1325  | 1.77E-12 | 11.752 |
| anserine                                        | 3.3      | 1.7225  | 1.77E-12 | 11.752 |
| pseudouridine                                   | 0.29254  | -1.7733 | 2.53E-12 | 11.597 |
| 1-palmitoleoyl-GPC 161                          | 0.2421   | -2.0463 | 2.59E-12 | 11.587 |
| $\gamma$ -glutamyl- $\epsilon$ -lysine          | 0.045241 | -4.4662 | 2.94E-12 | 11.531 |
| gulonic acid                                    | 0.075206 | -3.733  | 2.95E-12 | 11.53  |
| acetylcholine                                   | 8.4502   | 3.079   | 2.95E-12 | 11.53  |
| 3-sulfo-nervonoyl-galactosylceramide d181/241   | 2128800  | 21.022  | 3.18E-12 | 11.498 |
| 1-stearoyl-GPC 180                              | 2.3743   | 1.2475  | 3.45E-12 | 11.462 |
| sphingomyelin d181/170, d171/180, d191/160      | 11.889   | 3.5715  | 3.94E-12 | 11.404 |
| guanidinoacetate                                | 0.13129  | -2.9292 | 6.50E-12 | 11.187 |
| oxalate ethanedioate                            | 0.3813   | -1.391  | 8.01E-12 | 11.096 |
| allantoin                                       | 0.27469  | -1.8641 | 1.27E-11 | 10.897 |
| N-acetylneuraminate                             | 2.0588   | 1.0418  | 1.27E-11 | 10.897 |
| N-palmitoyl-sphingosine d181/160                | 0.47795  | -1.0651 | 1.29E-11 | 10.889 |
| C-glycosyltryptophan                            | 2.002    | 1.0015  | 1.32E-11 | 10.878 |
| sphingomyelin d181/201, d182/200                | 3.6483   | 1.8672  | 1.37E-11 | 10.863 |
| pyridoxal                                       | 2.1787   | 1.1235  | 1.49E-11 | 10.827 |
| 1-palmitoyl-2-palmitoleoyl-GPC 160/161          | 0.4379   | -1.1913 | 1.54E-11 | 10.811 |
| $\gamma$ -glutamylglutamate                     | 5.0684   | 2.3415  | 1.55E-11 | 10.809 |
| cholesterol                                     | 3.62     | 1.856   | 1.59E-11 | 10.798 |
| ornithine                                       | 0.23768  | -2.0729 | 1.78E-11 | 10.749 |
| succinate                                       | 0.27119  | -1.8826 | 1.78E-11 | 10.749 |
| inosine 5'-monophosphate                        | 0.19888  | -2.33   | 2.07E-11 | 10.683 |
| UDP-glucuronate                                 | 0.29023  | -1.7847 | 2.45E-11 | 10.611 |
| 2'-deoxyinosine                                 | 0.31248  | -1.6782 | 2.57E-11 | 10.59  |
| 1-palmitoyl-2-stearoyl-GPC 160/180              | 2.4824   | 1.3117  | 2.57E-11 | 10.59  |
| threonine                                       | 0.4181   | -1.2581 | 2.59E-11 | 10.586 |
| uridine 5'-monophosphate                        | 0.11992  | -3.0599 | 3.35E-11 | 10.475 |
| 1-palmitoleoyl-2-oleoyl-GPC 161/181             | 0.39027  | -1.3575 | 3.77E-11 | 10.424 |
| palmitoylcarnitine                              | 4.1212   | 2.0431  | 3.82E-11 | 10.418 |
| 2-methylcitrate/homocitrate                     | 2.519    | 1.3328  | 3.82E-11 | 10.418 |
| cytidine 5'-monophosphate                       | 0.4278   | -1.225  | 3.91E-11 | 10.407 |
| N2,N2-dimethylguanosine                         | 0.27814  | -1.8461 | 4.49E-11 | 10.348 |
| cytidine 2',3'-cyclic monophosphate             | 0.34193  | -1.5482 | 4.49E-11 | 10.348 |
| ergothioneine                                   | 0.22421  | -2.1571 | 5.42E-11 | 10.266 |
| 1-1-enyl-palmitoyl-2-arachidonoyl-GPC P-160/204 | 13.217   | 3.7243  | 5.57E-11 | 10.254 |
| cysteine                                        | 4.3425   | 2.1185  | 5.91E-11 | 10.228 |
| oleoylcarnitine                                 | 5.2648   | 2.3964  | 6.29E-11 | 10.201 |
| Pipecolic acid                                  | 0.35955  | -1.4758 | 7.38E-11 | 10.132 |
| guanosine                                       | 3.3152   | 1.7291  | 7.87E-11 | 10.104 |
| $\gamma$ -glutamylglutamine                     | 2.5648   | 1.3589  | 8.04E-11 | 10.095 |
| pyruvate                                        | 2.9854   | 1.5779  | 9.35E-11 | 10.029 |
| aconitate (cis or trans)                        | 3.5558   | 1.8302  | 1.12E-10 | 9.9494 |
| pyridoxamine phosphate                          | 6.203    | 2.633   | 1.12E-10 | 9.9494 |
| 5-methyl-2'-deoxycytidine                       | 0.30204  | -1.7272 | 1.33E-10 | 9.8754 |
| ribose 1-phosphate                              | 6.9337   | 2.7936  | 2.03E-10 | 9.6927 |
| stearoylcarnitine                               | 3.6565   | 1.8704  | 2.11E-10 | 9.6757 |
| N-palmitoyl-sphinganine d180/160                | 0.26183  | -1.9333 | 2.19E-10 | 9.6598 |
| 2'-deoxycytidine 5'-monophosphate               | 0.34037  | -1.5548 | 2.28E-10 | 9.6414 |
| 1-1-enyl-palmitoyl-2-oleoyl-GPE P-160/181       | 7.2675   | 2.8615  | 2.29E-10 | 9.6398 |
| adenosine 5'-monophosphate                      | 0.42299  | -1.2413 | 2.40E-10 | 9.6196 |
| lactate                                         | 2.1228   | 1.086   | 3.00E-10 | 9.5231 |
| sphingomyelin d182/230, d181/231, d171/241      | 300280   | 18.196  | 3.11E-10 | 9.5072 |

|                                                                                               |          |         |          |        |
|-----------------------------------------------------------------------------------------------|----------|---------|----------|--------|
| 1-palmitoyl-2-linoleoyl-GPE 160/182                                                           | 0.38938  | -1.3607 | 3.14E-10 | 9.5034 |
| citrulline                                                                                    | 0.39763  | -1.3305 | 3.37E-10 | 9.472  |
| $\beta$ -hydroxyisovalerate                                                                   | 0.35465  | -1.4955 | 3.95E-10 | 9.4037 |
| saccharopine                                                                                  | 6508800  | 22.634  | 4.90E-10 | 9.3099 |
| glycerol 3-phosphate                                                                          | 0.34275  | -1.5448 | 4.90E-10 | 9.3099 |
| <i>N</i> -acetyltyrosine                                                                      | 0.41322  | -1.275  | 6.15E-10 | 9.2111 |
| pyridoxamine                                                                                  | 4.5081   | 2.1725  | 8.22E-10 | 9.0849 |
| guanosine 5'-monophosphate                                                                    | 0.44088  | -1.1815 | 1.44E-09 | 8.8417 |
| cysteinylglycine                                                                              | 2.6547   | 1.4085  | 1.45E-09 | 8.8399 |
| 3-methylcytidine                                                                              | 0.38138  | -1.3907 | 1.50E-09 | 8.8234 |
| behenoyl sphingomyelin d181/220                                                               | 2.2784   | 1.188   | 1.82E-09 | 8.7409 |
| uridine 5'-diphosphate                                                                        | 0.12475  | -3.0029 | 2.80E-09 | 8.5532 |
| adenosine                                                                                     | 6.8208   | 2.7699  | 2.99E-09 | 8.5238 |
| malonylcarnitine                                                                              | 3.3321   | 1.7364  | 3.21E-09 | 8.4929 |
| <i>N</i> -acetylmethionine sulfoxide                                                          | 3.6893   | 1.8834  | 3.37E-09 | 8.4729 |
| butyrylcarnitine                                                                              | 0.31905  | -1.6481 | 4.07E-09 | 8.3905 |
| linoleoylcarnitine                                                                            | 4.3051   | 2.106   | 4.28E-09 | 8.3684 |
| flavin adenine dinucleotide                                                                   | 2.0447   | 1.0319  | 4.28E-09 | 8.3684 |
| 5-oxoproline                                                                                  | 2.04     | 1.0286  | 6.19E-09 | 8.2086 |
| spermidine                                                                                    | 0.30457  | -1.7152 | 7.25E-09 | 8.1399 |
| <i>N</i> -formylmethionine                                                                    | 2.1681   | 1.1165  | 8.68E-09 | 8.0617 |
| fructose                                                                                      | 0.25063  | -1.9964 | 9.62E-09 | 8.0167 |
| <i>N</i> -delta-acetylorithine                                                                | 6.1407   | 2.6184  | 1.01E-08 | 7.9966 |
| 1-stearoyl-2-oleoyl-GPC 180/181                                                               | 2.9262   | 1.549   | 1.08E-08 | 7.9657 |
| myristoylcarnitine                                                                            | 2.5901   | 1.373   | 1.14E-08 | 7.9414 |
| stachydrine                                                                                   | 2.3057   | 1.2052  | 1.32E-08 | 7.879  |
| prostaglandin E2                                                                              | 2.85     | 1.5109  | 1.36E-08 | 7.865  |
| dimethylglycine                                                                               | 0.33703  | -1.5691 | 1.61E-08 | 7.7938 |
| glutaryl carnitine C5                                                                         | 6.7046   | 2.7451  | 1.77E-08 | 7.7511 |
| dehydroascorbate                                                                              | 2.4321   | 1.2822  | 1.83E-08 | 7.737  |
| thiamin diphosphate                                                                           | 2.9459   | 1.5587  | 1.84E-08 | 7.7354 |
| 6-phosphogluconate                                                                            | 0.28069  | -1.8329 | 2.09E-08 | 7.6798 |
| cysteine sulfinic acid                                                                        | 15.559   | 3.9597  | 2.32E-08 | 7.635  |
| laurylcarnitine                                                                               | 4.5633   | 2.1901  | 2.45E-08 | 7.6116 |
| 2-aminoheptanoate                                                                             | 5.0048   | 2.3233  | 2.45E-08 | 7.6109 |
| 3-hydroxybutyrate                                                                             | 0.28464  | -1.8128 | 2.76E-08 | 7.5595 |
| galactonate                                                                                   | 0.29535  | -1.7595 | 3.04E-08 | 7.5165 |
| heme                                                                                          | 2.6974   | 1.4316  | 3.87E-08 | 7.4126 |
| palmitoylcholine                                                                              | 4.7901   | 2.2601  | 6.58E-08 | 7.182  |
| 1-palmitoleoyl-3-oleoyl-glycerol 161/181                                                      | 0.041627 | -4.5864 | 9.57E-08 | 7.0191 |
| proline                                                                                       | 0.48182  | -1.0534 | 1.04E-07 | 6.9841 |
| glucose                                                                                       | 0.2469   | -2.018  | 1.19E-07 | 6.9253 |
| Isobar fructose 1,6-diphosphate, glucose 1,6-diphosphate, myo-inositol 1,4 or 1,3-diphosphate | 0.25113  | -1.9935 | 1.27E-07 | 6.8952 |
| <i>N</i> 6-carboxymethyllysine                                                                | 3.5522   | 1.8287  | 1.44E-07 | 6.8431 |
| adenosine 2'-monophosphate                                                                    | 0.37507  | -1.4148 | 1.53E-07 | 6.8144 |
| $\gamma$ -glutamylvaline                                                                      | 0.4289   | -1.2213 | 1.66E-07 | 6.78   |
| 1,2-dilinoleoyl-GPC 182/182                                                                   | 0.48469  | -1.0449 | 1.82E-07 | 6.739  |
| cysteine-glutathione disulfide                                                                | 6.6664   | 2.7369  | 2.08E-07 | 6.6817 |
| sphingosine 1-phosphate                                                                       | 84510    | 16.367  | 2.28E-07 | 6.6424 |
| inositol 1-phosphate                                                                          | 2.4492   | 1.2923  | 2.96E-07 | 6.5288 |
| coenzyme A                                                                                    | 2.8197   | 1.4956  | 4.77E-07 | 6.3217 |
| methylmalonate                                                                                | 2.0726   | 1.0514  | 6.85E-07 | 6.1644 |
| argininosuccinate                                                                             | 2.3416   | 1.2275  | 7.94E-07 | 6.1004 |

|                                            |         |         |            |        |
|--------------------------------------------|---------|---------|------------|--------|
| adenosine 5'-diphosphoribose ADP-ribose    | 296.84  | 8.2135  | 9.41E-07   | 6.0264 |
| cytosine                                   | 0.40273 | -1.3121 | 1.07E-06   | 5.9715 |
| prostaglandin F2 $\alpha$                  | 2.526   | 1.3369  | 1.33E-06   | 5.8747 |
| 1-arachidonoyl-GPI 204                     | 4.5093  | 2.1729  | 1.42E-06   | 5.8478 |
| 2-aminoadipate                             | 2.2999  | 1.2016  | 1.89E-06   | 5.7225 |
| pyridoxal phosphate                        | 2.563   | 1.3578  | 2.30E-06   | 5.6375 |
| 2-methylbutyrylcarnitine C5                | 765060  | 19.545  | 2.31E-06   | 5.6366 |
| 4-acetamidobutanoate                       | 0.4209  | -1.2485 | 2.34E-06   | 5.63   |
| 3-hydroxyisobutyrate                       | 0.4529  | -1.1427 | 1.07E-05   | 4.9726 |
| 1-1-enyl-oleoyl-GPE P-181                  | 2.2525  | 1.1715  | 1.09E-05   | 4.9627 |
| N4-acetylcytidine                          | 0.25927 | -1.9475 | 1.47E-05   | 4.8327 |
| $\alpha$ -tocopherol                       | 2.9592  | 1.5652  | 1.52E-05   | 4.8172 |
| S-lactoylglutathione                       | 7.2943  | 2.8668  | 1.64E-05   | 4.7841 |
| 1-oleoyl-GPG 181                           | 17.495  | 4.1289  | 2.06E-05   | 4.686  |
| 3-hydroxybutyrylcarnitine 2                | 2.2086  | 1.1431  | 2.53E-05   | 4.5961 |
| $\gamma$ -glutamylhistidine                | 0.21373 | -2.2261 | 2.94E-05   | 4.5314 |
| N-stearoyltaurine                          | 2.3196  | 1.2139  | 4.66E-05   | 4.3312 |
| erucate 221n9                              | 5.1422  | 2.3624  | 5.11E-05   | 4.2915 |
| 1-palmitoyl-GPS 160                        | 0.2838  | -1.817  | 5.49E-05   | 4.2603 |
| solanidine                                 | 3.9245  | 1.9725  | 7.79E-05   | 4.1085 |
| allo-threonine                             | 2.8341  | 1.5029  | 8.31E-05   | 4.0806 |
| 1-1-enyl-stearoyl-GPE P-180                | 2.4186  | 1.2741  | 8.36E-05   | 4.0777 |
| indolelactate                              | 0.40907 | -1.2896 | 0.00010553 | 3.9766 |
| dihydroxyacetone phosphate                 | 0.49472 | -1.0153 | 0.00011992 | 3.9211 |
| stearate 180                               | 2.5486  | 1.3497  | 0.00013296 | 3.8763 |
| guanosine 3'-monophosphate                 | 9.9393  | 3.3131  | 0.00013297 | 3.8763 |
| oleoyl ethanolamide                        | 5.5757  | 2.4792  | 0.00013672 | 3.8642 |
| imidazole propionate                       | 5.7128  | 2.5142  | 0.00017238 | 3.7635 |
| 10-nonadecenoate 191n9                     | 787210  | 19.586  | 0.00019433 | 3.7115 |
| 2-hydroxy-3-methylvalerate                 | 3.4332  | 1.7795  | 0.00022024 | 3.6571 |
| adenylosuccinate                           | 0.4792  | -1.0613 | 0.00039836 | 3.3997 |
| adenosine 5'-diphosphate                   | 5.684   | 2.5069  | 0.00043821 | 3.3583 |
| eicosenoate 201                            | 3.6288  | 1.8595  | 0.00098573 | 3.0062 |
| linolenate $\alpha$ or $\gamma$ 183n3 or 6 | 0.39434 | -1.3425 | 0.0010827  | 2.9655 |
| arachidonate 204n6                         | 3.4764  | 1.7976  | 0.0011001  | 2.9585 |
| adrenate 224n6                             | 3.2377  | 1.695   | 0.0012023  | 2.92   |
| oleate/vaccenate 181                       | 2.8644  | 1.5183  | 0.0012045  | 2.9192 |
| 2'-deoxyadenosine                          | 4.6742  | 2.2247  | 0.0017159  | 2.7655 |
| 3-indoxyl sulfate                          | 5.7551  | 2.5248  | 0.0019744  | 2.7046 |
| galactose 1-phosphate                      | 0.41487 | -1.2693 | 0.0020376  | 2.6909 |
| fructose-6-phosphate                       | 0.42295 | -1.2415 | 0.0026612  | 2.5749 |
| 1-palmitoyl-GPG 160                        | 2.135   | 1.0942  | 0.0026651  | 2.5743 |
| docosahexaenoate 226n3                     | 2.9339  | 1.5528  | 0.0049165  | 2.3083 |
| 2-oleoylglycerol 181                       | 3.7374  | 1.902   | 0.0049592  | 2.3046 |
| phenol sulfate                             | 6.8315  | 2.7722  | 0.018664   | 1.729  |
| docosadienoate 222n6                       | 2.3406  | 1.2269  | 0.026193   | 1.5818 |
| gluconate                                  | 0.48884 | -1.0326 | 0.031631   | 1.4999 |

**Supplementary Table S2:** Forebrain metabolites significantly different between young adult (P60) and prepubertal/juvenile mice (P21). 14 metabolites were significantly higher in the forebrain of P60 mice compared to P21 mice and 29 metabolites significantly lower. Significant metabolites had a greater than two fold-change between the groups (P60 relative to P21) and an FDR-adjusted  $P < 0.05$ .

| Metabolite                                 | Fold change<br>(P60 vs. P21) | log2(FC) | p.adj      | -LOG10(p) |
|--------------------------------------------|------------------------------|----------|------------|-----------|
| N-methylnicotinic acid (trigonelline)      | 0.19463                      | -2.3612  | 3.67E-10   | 9.435     |
| stachydrine                                | 0.45015                      | -1.1515  | 4.19E-10   | 9.3774    |
| 4-guanidinobutanoate                       | 0.4767                       | -1.0689  | 4.19E-10   | 9.3774    |
| adenosine                                  | 2.3352                       | 1.2235   | 8.42E-10   | 9.0749    |
| 2'-deoxycytidine                           | 0.36112                      | -1.4694  | 1.30E-08   | 7.8863    |
| 2'-deoxyadenosine                          | 3.5413                       | 1.8243   | 7.61E-08   | 7.1189    |
| sphingomyelin d182/230, d181/231, d171/241 | 2.7127                       | 1.4398   | 1.39E-07   | 6.8575    |
| palmitoylcholine                           | 2.2075                       | 1.1424   | 1.53E-07   | 6.8148    |
| allantoin                                  | 0.46968                      | -1.0902  | 2.82E-07   | 6.5501    |
| hypotaurine                                | 0.49554                      | -1.0129  | 2.82E-07   | 6.5501    |
| 7-methylguanine                            | 0.073047                     | -3.775   | 3.34E-07   | 6.4768    |
| ergothioneine                              | 2.2677                       | 1.1812   | 8.73E-07   | 6.0592    |
| dimethylglycine                            | 0.23344                      | -2.0989  | 1.24E-06   | 5.9073    |
| pro-hydroxy-pro                            | 0.42465                      | -1.2356  | 1.24E-06   | 5.9073    |
| 2-aminoheptanoate                          | 0.31808                      | -1.6525  | 1.24E-06   | 5.9067    |
| adenosine 2'-monophosphate                 | 0.30743                      | -1.7017  | 2.81E-06   | 5.5508    |
| putrescine                                 | 0.23335                      | -2.0994  | 3.47E-06   | 5.4601    |
| 5-methyl-2'-deoxycytidine                  | 0.29698                      | -1.7516  | 4.12E-06   | 5.3846    |
| inosine 5'-monophosphate                   | 0.38271                      | -1.3857  | 8.45E-06   | 5.0729    |
| adenosine 5'-diphosphoribose               | 2.2571                       | 1.1745   | 8.46E-06   | 5.0726    |
| uridine 5'-monophosphate                   | 0.42684                      | -1.2282  | 2.97E-05   | 4.5274    |
| 3-methylcytidine                           | 0.3973                       | -1.3317  | 3.07E-05   | 4.5133    |
| cysteinylglycine                           | 2.2831                       | 1.191    | 3.80E-05   | 4.4198    |
| glutathione                                | 2.1769                       | 1.1223   | 9.05E-05   | 4.0433    |
| 2'-deoxyinosine                            | 0.44955                      | -1.1534  | 9.14E-05   | 4.0389    |
| 4-hydroxy-nonenal-glutathione              | 0.48304                      | -1.0498  | 0.00016992 | 3.7698    |
| adenylosuccinate                           | 0.25492                      | -1.9719  | 0.00026016 | 3.5848    |
| N4-acetylcytidine                          | 0.21734                      | -2.202   | 0.000335   | 3.475     |
| 3-ureidopropionate                         | 0.49395                      | -1.0176  | 0.00081704 | 3.0878    |
| imidazole propionate                       | 0.24348                      | -2.0382  | 0.00085564 | 3.0677    |
| palmitoyl ethanolamide                     | 2.5653                       | 1.3591   | 0.00086244 | 3.0643    |
| S-lactoylglutathione                       | 2.2332                       | 1.1591   | 0.00099882 | 3.0005    |
| cytosine                                   | 0.22993                      | -2.1208  | 0.0010009  | 2.9996    |
| guanosine 3'-monophosphate                 | 0.20606                      | -2.2789  | 0.0011251  | 2.9488    |
| urate                                      | 3.3978                       | 1.7646   | 0.001443   | 2.8407    |
| gamma-glutamylglycine                      | 2.0527                       | 1.0375   | 0.0016778  | 2.7753    |
| 2-hydroxy-3-methylvalerate                 | 0.40993                      | -1.2865  | 0.0019479  | 2.7104    |
| uridine 5'-diphosphate                     | 0.3935                       | -1.3456  | 0.0020251  | 2.6936    |
| phenol sulfate                             | 3.3664                       | 1.7512   | 0.0038704  | 2.4122    |
| 1-oleoyl-GPG 181                           | 2.1815                       | 1.1253   | 0.0046484  | 2.3327    |
| indolelactate                              | 0.30026                      | -1.7357  | 0.011497   | 1.9394    |
| 1-methylnicotinamide                       | 0.42243                      | -1.2432  | 0.018371   | 1.7359    |
| N-palmitoyltaurine                         | 0.41276                      | -1.2766  | 0.02309    | 1.6366    |
